# Supplementary material for: Determining the utility of veterinary tissue archives for retrospective DNA analysis
Source: PeerJ. 2016 May 3;4:e1996. doi: 10.7717/peerj.1996 (PMC4860330; doi:10.7717/peerj.1996)
Supplement: Data S1 [file peerj-04-1996-s001.csv]

Years	Max Amplicon Size
2015	500
2015	300
2015	500
2015	500
2015	500
2012	200
2012	300
2012	200
2012	300
2012	500
2007	200
2007	500
2007	500
2007	200
2007	300
2002	300
2002	300
2002	300
2002	300
2002	200
1997	500
1997	300
1997	300
1997	300
1997	300
1992	300
1992	300
1992	500
1992	300
1992	300
1987	300
1987	300
1987	300
1987	500
1987	500
1982	300
1982	300
1982	300
1982	300
1982	300
1977	200
1977	500
1977	300
1977	300
1977	300
